# Supplementary material for: Cardio-Protective Properties and Health Benefits of Fish Lipid Bioactives; The Effects of Thermal Processing
Source: MDPI journal article supplement (doi:10.3390/md20030187), 2022-03-02
Supplement: s1 [file s1]

**Supplementary Table 1.** Characteristic examples on the fatty acid composition of important fish species (expressed in % of total fatty acids in TL or PL content of raw samples)

|                           | Salmon   |          |          |                      |                   | Mackerel |          |             | Sea bass |                     |                    | Sardines    |          | Herring  |                     |                   |                  |                      | Cod             |          |          |
|---------------------------|----------|----------|----------|----------------------|-------------------|----------|----------|-------------|----------|---------------------|--------------------|-------------|----------|----------|---------------------|-------------------|------------------|----------------------|-----------------|----------|----------|
| Main Fatty Acids Measured | TL [247] | TL [248] | TL [249] | PL from fillets [30] | PL from heads [9] | TL [34]  | TL [250] | TL [71,251] | TL [252] | TL from farms [253] | TL from wild [253] | PL [59,117] | TL [254] | TL [231] | PL from fillets [9] | PL from heads [9] | TL (Spain) [255] | TL (Non Spain) [255] | TL (wild) [256] | TL [257] | TL [207] |
| Myristic Acid (C14:0)     | 4.43     | 3.74     | 4.88     | 2.107                | 1.401             | 2.10     |          | 2.19        |          | 3.00                | 3.90               | 1.7         | 7.91     | 14.2     | 0.477               | 3.101             | 3.56             | 3.99                 | 1.5             | 2.2      | 1.3      |
| Palmitic Acid (C16:0)     | 17.88    | 17.9     | 12.72    | 22.56                | 1.367             | 29.40    | 54.97    | 14.5        | 0.12     | 13.00               | 15.10              | 4.5         | 24.23    | 15.0     | 48.74               | 19.89             | 19.62            | 18.35                | 22.7            | 4.5      | 18.3     |
| Stearic Acid (C18:0)      | 4.27     | 5.18     | 2.37     | 6.331                | 5.732             | 3.80     |          | 7.17        | 19.46    | 3.52                | 3.80               | 11          | 5.41     | 1.4      | 8.621               | 5.088             | 3.54             | 2.55                 | 6.2             | 8.8      | 3.7      |
| Oleic Acid (C18:1n9)      | 36.44    | 32.36    | 16.29    | 13.31                | 14.16             | 8.15     | 1.60     | 10.5        | 3.90     | 24.13               | 23.28              | 7.3         | 6.81     | 19.2     | 8.969               | 13.30             | 19.72            | 23.78                | 8.1             | 16.3     | 12.2     |
| EPA (C20:5n3)             | 5.83     | 5.7      | 5.72     | 10.02                | 10.89             | 1.35     | 15.72    | 4.74        | 23.16    | 4.92                | 0.00               | 35.7        | 11.74    | 7.5      | 10.12               | 8.776             | 7.52             | 8.74                 | 11.9            | 31.3     | 11.0     |
| DHA                       | 7.64     | 7.36     | 8.53     | 12.94                | 36.87             | 21.6     |          | 35.2        | 5.58     | 5.37                | 6.35               | 38.9        | 21.29    | 6.3      | 16.79               | 25.62             | 9.98             | 8.58                 | 32.3            | 35.6     | 38.6     |

|                                |       |      |      |       |       |      |       |      |           |      |      |      |      |     |       |       |      |      |      |      |     |
|--------------------------------|-------|------|------|-------|-------|------|-------|------|-----------|------|------|------|------|-----|-------|-------|------|------|------|------|-----|
| <b>(C22:6n3)</b>               |       |      |      |       |       | 1    |       |      |           |      |      |      |      |     |       |       |      |      |      |      |     |
| <b>ALA (C18:3n-3)</b>          | 2.43  | 0.95 | 1.1  | 2.139 | 1.496 | 0.80 | 9.20  | 0.72 | 15.1<br>1 | 1.57 | 1.55 | N.D. | 0.79 | 6.5 | 0.269 | 0.538 | 0.25 | 0.41 | N.D. | 3    | 0.8 |
| <b>Linoleic Acid (C18:2n6)</b> | 10.84 | 9.64 | 3.65 | 6.938 | 8.822 | 5.15 | 9.59  | 3.46 | 0.39      | 15.6 | 9.45 | N.D  | 2.12 | 2.6 | 0.242 | 1.205 | 0.97 | 0.99 | 1.1  | 8    | 1.7 |
| <b>n6/n3 ratio</b>             | 0.7   | -    | 0.8  | 0.37  | 0.211 | 0.4  | 0.541 | 0.1  | 0.1       | 1.16 | 1.10 | 0.02 | 0.1  | -   | 0.024 | 0.101 | -    | -    | 0.02 | 0.02 | 0.1 |

\*Abbreviations: DHA: Docosahexaenoic Acid ; EPA: Eicosapentaenoic Acid ; ALA: Alpha Linolenic Acid; PL: Polar Lipids

**Supplementary Table 2:** The effects of different thermal processing - cooking techniques on the lipid content of salmon, mackerel, seabass, seabream, sardines, herring and cod

| Thermal Processing - Cooking Method | Effect on salmon lipid content                                                                                                                                                              | Effect on mackerel lipid content | Effect on seabass and seabream lipid content                                                                                                                                                                                                                                                                                                                                                                                                                                              | Effect on sardines' lipid content                                                                  | Effect on herring lipid content                                                                                                                                                                                                                                                                                                                                         | Effect on cod lipid content                                                                                                                                                                                                                                                                          |
|-------------------------------------|---------------------------------------------------------------------------------------------------------------------------------------------------------------------------------------------|----------------------------------|-------------------------------------------------------------------------------------------------------------------------------------------------------------------------------------------------------------------------------------------------------------------------------------------------------------------------------------------------------------------------------------------------------------------------------------------------------------------------------------------|----------------------------------------------------------------------------------------------------|-------------------------------------------------------------------------------------------------------------------------------------------------------------------------------------------------------------------------------------------------------------------------------------------------------------------------------------------------------------------------|------------------------------------------------------------------------------------------------------------------------------------------------------------------------------------------------------------------------------------------------------------------------------------------------------|
| <b>Boiling</b>                      | <ul style="list-style-type: none"> <li>• no significant difference on EPA and DHA content [257,258]</li> <li>• No increase in the PV and MDA indexes of lipid peroxidation [206]</li> </ul> | -                                | <ul style="list-style-type: none"> <li>• An increase of the % lipid wet weight, with no significant changes in the SFA were observed by [195]</li> <li>• In contrast, in other studies SFA, MUFA were increased, n-6 PUFA remained the same, n-3 PUFA and especially EPA and DHA were decreased and subsequently the n-6/n-3 PUFA ratio was increased, while the PUFA/SFA was declined [211]</li> <li>• The marker of oxidation, thiobarbituric acid (TBA) was increased [224]</li> </ul> | <ul style="list-style-type: none"> <li>• Decreased SFA and increased MUFA content [259]</li> </ul> | <ul style="list-style-type: none"> <li>• Reduction of palmitic acid, with no significant effect on the levels of oleic acid, while EPA and DHA levels were reduced [258]</li> <li>• Instead, in other studies no major losses in the amount of the unsaturated fats, without also a reduction on the n-3 PUFA fraction of the total fatty acid content [231]</li> </ul> | <ul style="list-style-type: none"> <li>• Total level of lipid content and palmitic acid were decreased, whereas MUFA, especially oleic acid, were increased, while the amounts of n-3 and n-6 PUFA did not alter and the n-6/n-3 PUFA was slightly increased upon thermal treatment [259]</li> </ul> |

| Thermal Processing - Cooking Method | Effect on salmon lipid content                                                                                                                                                                                                                                                                                                                                                                                                              | Effect on mackerel lipid content                                                                                                                                                                                                                                                                                                                                                                                                                                                                                                                       | Effect on seabass and seabream lipid content                                                                                                                                                                                   | Effect on sardines' lipid content | Effect on herring lipid content | Effect on cod lipid content                                                                                                                                                                                                                               |
|-------------------------------------|---------------------------------------------------------------------------------------------------------------------------------------------------------------------------------------------------------------------------------------------------------------------------------------------------------------------------------------------------------------------------------------------------------------------------------------------|--------------------------------------------------------------------------------------------------------------------------------------------------------------------------------------------------------------------------------------------------------------------------------------------------------------------------------------------------------------------------------------------------------------------------------------------------------------------------------------------------------------------------------------------------------|--------------------------------------------------------------------------------------------------------------------------------------------------------------------------------------------------------------------------------|-----------------------------------|---------------------------------|-----------------------------------------------------------------------------------------------------------------------------------------------------------------------------------------------------------------------------------------------------------|
| Steaming                            | <ul style="list-style-type: none"> <li>• no significant differences in MUFA (oleic acid), DHA, EPA, DPA and overall lipid content, as well as in lipid oxidation [210,248,261]</li> <li>• On the other hand, in other studies n-3 PUFA were increased [247]</li> <li>• Instead, other studies reported slight reduction on the n-3 PUFA (EPA and DHA) content was reported [257], as well as decreased cholesterol content [261]</li> </ul> | <ul style="list-style-type: none"> <li>• Total lipid content, n6/n3 PUFA ratio and Vitamin A were decreased, while oleic acid, overall MUFA, PUFA, and especially n-3 PUFA and Vitamin D3 were increased [34]</li> <li>• Other studies reported Increased PUFA and n-3 PUFA, while MUFA were decreased [247]</li> <li>• In contrast, others reported a substantial decrease in the content of DHA and loss of Docosadienoic acid [250], but an increase in the PL [262,263], and an increase in the Peroxide and thiobarbituric acid values</li> </ul> | <ul style="list-style-type: none"> <li>• An increase of the % lipid wet weight, with no significant changes in the SFA [195]</li> <li>• The marker of oxidation, thiobarbituric acid (TBA) was also increased [224]</li> </ul> | •                                 | •                               | <ul style="list-style-type: none"> <li>• A decrease of fat content a very slight increase in SFAs and MUFAs, while diminishing the PUFA amount. for vitamin D3 steaming retains the most Vitamin E was relatively stable during steaming [233]</li> </ul> |

| Thermal Processing - Cooking Method                        | Effect on salmon lipid content                                                                                                                                                                                                                                                                                                                                                                                                                                                                                                                                 | Effect on mackerel lipid content                                                                                                                                                 | Effect on seabass and seabream lipid content                                                                                                                                                                                                                                                                                                                              | Effect on sardines' lipid content                                                                                                                                                                                    | Effect on herring lipid content                                                                                                                                    | Effect on cod lipid content                                                                                                                                                                                                                                                                                                    |
|------------------------------------------------------------|----------------------------------------------------------------------------------------------------------------------------------------------------------------------------------------------------------------------------------------------------------------------------------------------------------------------------------------------------------------------------------------------------------------------------------------------------------------------------------------------------------------------------------------------------------------|----------------------------------------------------------------------------------------------------------------------------------------------------------------------------------|---------------------------------------------------------------------------------------------------------------------------------------------------------------------------------------------------------------------------------------------------------------------------------------------------------------------------------------------------------------------------|----------------------------------------------------------------------------------------------------------------------------------------------------------------------------------------------------------------------|--------------------------------------------------------------------------------------------------------------------------------------------------------------------|--------------------------------------------------------------------------------------------------------------------------------------------------------------------------------------------------------------------------------------------------------------------------------------------------------------------------------|
| <b>Oven Cooked</b> /<br><b>Baking</b> /<br><b>Roasting</b> | <ul style="list-style-type: none"> <li>• No significant changes in SFA, MUFA or PUFA % content [248]</li> <li>• On the other hand others reported increased PUFA, with a slight increase of n-3 PUFA, EPA and DHA [247], while cholesterol was decreased [261]</li> <li>• In contrast others reported that n-3 PUFA (EPA and DHA) were slightly reduced [257,258]</li> <li>• Others found that MUFA and DHA were increased, with decreased overall n-3 PUFA content and PUFA were not significantly oxidised [264].</li> <li>• Changes in PUFA lev-</li> </ul> | <ul style="list-style-type: none"> <li>• no drastic changes in the SFA composition, MUFA were decreased, while PUFA and especially the n-6 PUFA were increased [247].</li> </ul> | <ul style="list-style-type: none"> <li>• SFA, MUFA were increased, n-6 PUFA remained the same, n-3 PUFA and especially EPA and DHA were decreased and subsequently the n-6/n-3 PUFA ratio was increased, while the PUFA/SFA was declined [211].</li> <li>• On the other hand others reported that during oven Broiling, both MUFA and SFA were decreased [265]</li> </ul> | <ul style="list-style-type: none"> <li>• The fatty acid profile and the n-3/n-6 PUFA ratio has not been substantially changed, even though a slight increase in the EPA and DHA levels was observed [254]</li> </ul> | <ul style="list-style-type: none"> <li>• No changes in the lipid abundance and composition and the n-6/n-3 PUFA ratio and overall content of PUFA [266]</li> </ul> | <ul style="list-style-type: none"> <li>• Most of the lipids were preserved for both wild and farmed cod [256,266]</li> <li>• Instead others reported a decrease of fat content, with a very slight increase in SFAs and MUFAs, while diminishing the PUFA content, while vitamin E remained relatively stable [233]</li> </ul> |

| Thermal Processing - Cooking Method | Effect on salmon lipid content                                                                                                                                                                                                                                                                                                 | Effect on mackerel lipid content                                                                                                                                                                                                                                                                                                                   | Effect on seabass and seabream lipid content                                                                                                                                                                                                                                                                                                                                                          | Effect on sardines' lipid content                                                                                                                                                                                                                                                                                                                                     | Effect on herring lipid content                                                                                                                                                                    | Effect on cod lipid content                                                                                             |
|-------------------------------------|--------------------------------------------------------------------------------------------------------------------------------------------------------------------------------------------------------------------------------------------------------------------------------------------------------------------------------|----------------------------------------------------------------------------------------------------------------------------------------------------------------------------------------------------------------------------------------------------------------------------------------------------------------------------------------------------|-------------------------------------------------------------------------------------------------------------------------------------------------------------------------------------------------------------------------------------------------------------------------------------------------------------------------------------------------------------------------------------------------------|-----------------------------------------------------------------------------------------------------------------------------------------------------------------------------------------------------------------------------------------------------------------------------------------------------------------------------------------------------------------------|----------------------------------------------------------------------------------------------------------------------------------------------------------------------------------------------------|-------------------------------------------------------------------------------------------------------------------------|
|                                     | <p>els were accompanied with increased of lipid peroxidation indexes, PV and MDA[206]</p> <ul style="list-style-type: none"> <li>• In contrast others reported no significant differences and oxidation of lipids, during baking[260]</li> </ul>                                                                               |                                                                                                                                                                                                                                                                                                                                                    |                                                                                                                                                                                                                                                                                                                                                                                                       |                                                                                                                                                                                                                                                                                                                                                                       |                                                                                                                                                                                                    |                                                                                                                         |
| <b>Grilled</b>                      | <ul style="list-style-type: none"> <li>• No significant difference on the EPA and DHA content [257,258]</li> <li>• In contrast, others reported that the fatty acid content, and especially the n-3 PUFA, EPA and DHA, were increased, with stability against oxidation, while cholesterol was decreased [260,261].</li> </ul> | <ul style="list-style-type: none"> <li>• Large increase in total lipid content, associated with increases in SFA, while MUFA and PUFA (especially DHA), were decreased, without however affecting significantly the n-6/n-3 ratio [250,262]</li> <li>• Heptadecanoic, arachidonic and Docosadienoic acid were lost after grilling [250]</li> </ul> | <ul style="list-style-type: none"> <li>• No changes in the total lipid content [267]</li> <li>• In contrast, others reported that levels of SFA and MUFA were decreased, PUFA were increased, while losses in n-3 PUFA content were observed, as well as reduction of myristic acid, palmitic acid, palmitoleic acid, stearic acid, elaidic acid, oleic acid, linoleic acid, heneicosanoic</li> </ul> | <ul style="list-style-type: none"> <li>• Reduced lipid content and decrease in the SFA, MUFA and PUFA [268], with a high loss of n-3 PUFA, such as EPA and DHA [259], due to the autoxidation of lipids, forming allyl hydroperoxides [268]</li> <li>• PL from the sardines undergone to heat treatment during grilling were 8 times less biologically ac-</li> </ul> | <ul style="list-style-type: none"> <li>• No major losses in the amount of the unsaturated fats, without also a reduction on the n-3 PUFA fraction of the total fatty acid content [231]</li> </ul> | <ul style="list-style-type: none"> <li>• A significant increase was observed in the n-6/n-3 PUFA ratio [266]</li> </ul> |

| Thermal Processing - Cooking Method               | Effect on salmon lipid content                                                                                                                                                                                                                | Effect on mackerel lipid content                   | Effect on seabass and seabream lipid content                                                                                                                                                                                                                                                                                                                                  | Effect on sardines' lipid content                                                                                                                         | Effect on herring lipid content                    | Effect on cod lipid content                                                                                           |
|---------------------------------------------------|-----------------------------------------------------------------------------------------------------------------------------------------------------------------------------------------------------------------------------------------------|----------------------------------------------------|-------------------------------------------------------------------------------------------------------------------------------------------------------------------------------------------------------------------------------------------------------------------------------------------------------------------------------------------------------------------------------|-----------------------------------------------------------------------------------------------------------------------------------------------------------|----------------------------------------------------|-----------------------------------------------------------------------------------------------------------------------|
|                                                   |                                                                                                                                                                                                                                               |                                                    | <p>acid, eicosenoic acid, EPA, nervonic acid and DHA fatty acid contents [252]</p> <ul style="list-style-type: none"> <li>Others have also reported that grilling did not affect the cardio-protective bioactivities of sea bream PL against the platelet aggregation induced by the highly bioactive inflammatory mediator platelet activating factor (PAF) [232]</li> </ul> | <p>tive, against the inflammatory mediator PAF, than the raw sample [117]</p>                                                                             |                                                    |                                                                                                                       |
| <b>Pan frying without the addition of fat/oil</b> | <ul style="list-style-type: none"> <li>No significant changes in SFA, MUFA or PUFA % content [248,210], while the n-6/n-3 PUFA ratio was increased [210]</li> <li>Others have reported significant change in PUFA levels, with the</li> </ul> | <ul style="list-style-type: none"> <li></li> </ul> | <ul style="list-style-type: none"> <li></li> </ul>                                                                                                                                                                                                                                                                                                                            | <ul style="list-style-type: none"> <li>Altered fatty acids content, with increased oleic and linoleic acids and lower EPA and DHA levels [250]</li> </ul> | <ul style="list-style-type: none"> <li></li> </ul> | <ul style="list-style-type: none"> <li>A significant increase was observed in the n-6/n-3 PUFA ratio [266]</li> </ul> |

| Thermal Processing - Cooking Method         | Effect on salmon lipid content                                                                                                                                                                                                                                                      | Effect on mackerel lipid content                   | Effect on seabass and seabream lipid content       | Effect on sardines' lipid content                                                                                                                                                                                                 | Effect on herring lipid content                    | Effect on cod lipid content                                                                                                                                                                                                                                                                                                        |
|---------------------------------------------|-------------------------------------------------------------------------------------------------------------------------------------------------------------------------------------------------------------------------------------------------------------------------------------|----------------------------------------------------|----------------------------------------------------|-----------------------------------------------------------------------------------------------------------------------------------------------------------------------------------------------------------------------------------|----------------------------------------------------|------------------------------------------------------------------------------------------------------------------------------------------------------------------------------------------------------------------------------------------------------------------------------------------------------------------------------------|
|                                             | peroxidation of both n-3 PUFA and n-6 PUFA being intensified, with a subsequent increase in the PV and MDA indexes of lipid peroxidation, and significant elevation in 4-HHE and 4-HNE levels [206].                                                                                |                                                    |                                                    |                                                                                                                                                                                                                                   |                                                    |                                                                                                                                                                                                                                                                                                                                    |
| <b>Pan-frying in extra virgin Olive Oil</b> | <ul style="list-style-type: none"> <li>Higher contents of MUFA, with slight increase in oleic acid and SFA [269], and slightly (but not significantly) decreased EPA and DHA and increased n-6/n-3PUFA ratio [208,264], while PUFA were not significantly oxidised [264]</li> </ul> | <ul style="list-style-type: none"> <li></li> </ul> | <ul style="list-style-type: none"> <li></li> </ul> | <ul style="list-style-type: none"> <li>Increased MUFA, especially oleic acid, decreased SFA and PUFA, with reduced n-3 PUFA, especially EPA and DHA, while n-6 PUFA were increased, especially linoleic acid [269,270]</li> </ul> | <ul style="list-style-type: none"> <li></li> </ul> | <ul style="list-style-type: none"> <li>Increased MUFA and decreased SFA and PUFA, while individually palmitic acid, oleic acid, linoleic acid, DHA and EPA levels, with the n-6/n-3 ratio being increased [207]</li> <li>Instead others reported increased overall fatty acids' content, SFA, MUFA and PUFA (especially</li> </ul> |



| Thermal Processing - Cooking Method | Effect on salmon lipid content                                                                                                                                               | Effect on mackerel lipid content                                                                                                                                                                                                                                             | Effect on seabass and seabream lipid content                                                                                                                                                                                                                       | Effect on sardines' lipid content                                                                                                                                   | Effect on herring lipid content                                                                                                                                                                 | Effect on cod lipid content                                                                                                                                                                                                                                                                                                                                         |
|-------------------------------------|------------------------------------------------------------------------------------------------------------------------------------------------------------------------------|------------------------------------------------------------------------------------------------------------------------------------------------------------------------------------------------------------------------------------------------------------------------------|--------------------------------------------------------------------------------------------------------------------------------------------------------------------------------------------------------------------------------------------------------------------|---------------------------------------------------------------------------------------------------------------------------------------------------------------------|-------------------------------------------------------------------------------------------------------------------------------------------------------------------------------------------------|---------------------------------------------------------------------------------------------------------------------------------------------------------------------------------------------------------------------------------------------------------------------------------------------------------------------------------------------------------------------|
|                                     |                                                                                                                                                                              |                                                                                                                                                                                                                                                                              |                                                                                                                                                                                                                                                                    |                                                                                                                                                                     |                                                                                                                                                                                                 | oleic acid and linoleic acid, while significant decreases were reported for palmitic, $\alpha$ -linolenic, DHA and EPA), with a subsequent slight increase of the n-6/n-3 PUFA ratio [208]                                                                                                                                                                          |
| <b>Pan-frying in Sunflower oil</b>  | <ul style="list-style-type: none"> <li>Decreased EPA and DHA [258], while the n-6 linoleic acid was increased, and thus the n-6/n-3PUFA ratio was increased [208]</li> </ul> | <ul style="list-style-type: none"> <li>Increased total lipid content and oleic acid, PUFA levels and the n6/n3 PUFA ratio, whereas SFA were decreased [34].</li> <li>Reduced vitamin A and significant increase in vitamin E (<math>\alpha</math>-tocopherol)[34]</li> </ul> | <ul style="list-style-type: none"> <li>Increased lipid content [267]</li> <li>Increased MUFA and n-6 PUFA, while SFA and n-3 PUFA (especially DHA and EPA) were decreased, with a subsequent increase in the n-6/n-3 PUFA and the PUFA/SFA ratios [211]</li> </ul> | <ul style="list-style-type: none"> <li>Increased oleic acid and decreased SFA and n-3 PUFA (especially EPA and DHA), while n-6 PUFA were increased [269]</li> </ul> | <ul style="list-style-type: none"> <li>Reduction in the levels of palmitic acid, with no significant effect on the levels of oleic acid, while EPA and DHA levels were reduced [258]</li> </ul> | <ul style="list-style-type: none"> <li>increased overall fatty acids' content, SFA, MUFA and PUFA (especially oleic acid and linoleic acid, while significant decreases were reported for palmitic, <math>\alpha</math>-linolenic, DHA and EPA), with a subsequent slight increase of the n-6/n-3 PUFA ratio [208]</li> <li>PL retained their strong an-</li> </ul> |

| Thermal Processing - Cooking Method | Effect on salmon lipid content                                                                                                                                  | Effect on mackerel lipid content                                                      | Effect on seabass and seabream lipid content                                                                                                                                                                    | Effect on sardines' lipid content                  | Effect on herring lipid content                    | Effect on cod lipid content                                                                                                                            |
|-------------------------------------|-----------------------------------------------------------------------------------------------------------------------------------------------------------------|---------------------------------------------------------------------------------------|-----------------------------------------------------------------------------------------------------------------------------------------------------------------------------------------------------------------|----------------------------------------------------|----------------------------------------------------|--------------------------------------------------------------------------------------------------------------------------------------------------------|
|                                     |                                                                                                                                                                 |                                                                                       |                                                                                                                                                                                                                 |                                                    |                                                    | ti-inflammatory and anti-atherogenic properties against the PAF-pathways, while in some cases this anti-inflammatory potency was even increased [118]. |
| Pan Frying with Corn Oil            | <ul style="list-style-type: none"> <li>Slight exchange of fats between the pan-frying medium and the sample, and a slight increase in the SFA. [210]</li> </ul> | <ul style="list-style-type: none"> <li></li> </ul>                                    | <ul style="list-style-type: none"> <li>Increased MUFA and n-6 PUFA and decreased SFA and n-3 PUFA (especially DHA and EPA), with a subsequent increase in the n-6/n-3 PUFA and PUFA/SFA ratios [211]</li> </ul> | <ul style="list-style-type: none"> <li></li> </ul> | <ul style="list-style-type: none"> <li></li> </ul> | <ul style="list-style-type: none"> <li></li> </ul>                                                                                                     |
| Pan Frying with Soya Oil            | <ul style="list-style-type: none"> <li>No significant differences in the fatty acid profile, but the n-6/n-3 PUFA ratio was increased [264]</li> </ul>          | <ul style="list-style-type: none"> <li></li> </ul>                                    | <ul style="list-style-type: none"> <li></li> </ul>                                                                                                                                                              | <ul style="list-style-type: none"> <li></li> </ul> | <ul style="list-style-type: none"> <li></li> </ul> | <ul style="list-style-type: none"> <li></li> </ul>                                                                                                     |
| Pan Frying with palm                | <ul style="list-style-type: none"> <li>A slight increase in the SFA.</li> </ul>                                                                                 | <ul style="list-style-type: none"> <li>Changes in the SFA/PUFA ratio, with</li> </ul> | <ul style="list-style-type: none"> <li></li> </ul>                                                                                                                                                              | <ul style="list-style-type: none"> <li></li> </ul> | <ul style="list-style-type: none"> <li></li> </ul> | <ul style="list-style-type: none"> <li></li> </ul>                                                                                                     |

| Thermal Processing - Cooking Method                                                                   | Effect on salmon lipid content                                                                                                                                                                                      | Effect on mackerel lipid content                                                                                                                                     | Effect on seabass and seabream lipid content | Effect on sardines' lipid content                                                                                                              | Effect on herring lipid content                                                                                                                                      | Effect on cod lipid content                                                                                                                                                                                                                                                                                               |
|-------------------------------------------------------------------------------------------------------|---------------------------------------------------------------------------------------------------------------------------------------------------------------------------------------------------------------------|----------------------------------------------------------------------------------------------------------------------------------------------------------------------|----------------------------------------------|------------------------------------------------------------------------------------------------------------------------------------------------|----------------------------------------------------------------------------------------------------------------------------------------------------------------------|---------------------------------------------------------------------------------------------------------------------------------------------------------------------------------------------------------------------------------------------------------------------------------------------------------------------------|
| oil                                                                                                   | <ul style="list-style-type: none"> <li>Partially hydrogenated plant oil did not increase the trans fatty acids content [210]</li> </ul>                                                                             | losses of the heptadecanoic, elaidic, erucic and arachidonic acid, accompanied with a significant decrease of EPA and DHA [250]                                      |                                              |                                                                                                                                                |                                                                                                                                                                      |                                                                                                                                                                                                                                                                                                                           |
| Pan Frying with Coconut Oil                                                                           |                                                                                                                                                                                                                     | <ul style="list-style-type: none"> <li>Highly increased SFA (418%), while MUFA were also increased and PUFA were decreased (especially EPA and DHA) [271]</li> </ul> | •                                            | •                                                                                                                                              | •                                                                                                                                                                    | •                                                                                                                                                                                                                                                                                                                         |
| Other types of frying (i.e. deep frying or frying with rapeseed oil or margarine or lard or "Smazyk") | <ul style="list-style-type: none"> <li>Deep frying induced increased SFA and decreased MUFA, but oleic acid was increased, while linoleic acid was retained, whereas DHA, EPA and DPA were reduced [248]</li> </ul> | •                                                                                                                                                                    | •                                            | <ul style="list-style-type: none"> <li>Frying with lard did not affect n-3 PUFA, while oleic acid and n-6 PUFA were increased [270]</li> </ul> | <ul style="list-style-type: none"> <li>Frying with "Smazyk" showed no major losses in the amount of the unsaturated fats and especially in n-3 PUFA [231]</li> </ul> | <ul style="list-style-type: none"> <li>Frying with margarine increased lipid content and SFA, while PUFA were decreased and the n-6/n-3 PUFA ratio was increased in [207]</li> <li>Frying in rapeseed oil increased also the fat content and MUFA, and reduced SFA and PUFA, while vitamin A (retinol) was re-</li> </ul> |

| Thermal Processing - Cooking Method | Effect on salmon lipid content                                                                                                                                                                                              | Effect on mackerel lipid content | Effect on seabass and seabream lipid content                                                                                                                                                                                                                                                                                         | Effect on sardines' lipid content | Effect on herring lipid content | Effect on cod lipid content              |
|-------------------------------------|-----------------------------------------------------------------------------------------------------------------------------------------------------------------------------------------------------------------------------|----------------------------------|--------------------------------------------------------------------------------------------------------------------------------------------------------------------------------------------------------------------------------------------------------------------------------------------------------------------------------------|-----------------------------------|---------------------------------|------------------------------------------|
|                                     |                                                                                                                                                                                                                             |                                  |                                                                                                                                                                                                                                                                                                                                      |                                   |                                 | tained and vitamin E was increased [233] |
| Sous-Vide                           | <ul style="list-style-type: none"> <li>The n-3 PUFA content, the n-6/n-3 PUFA ratio and the anti-inflammatory and antithrombotic bio-functionality of PL baring n-3 PUFA were retained in low temperatures [57].</li> </ul> |                                  | <ul style="list-style-type: none"> <li>Increased lipid content, with no significant changes in the SFA [195]</li> <li>The marker of oxidation, thiobarbituric acid (TBA) was increased, but this increase was much lower than boiled or steamed samples, suggesting much less oxidation in sous vide heat treatment [224]</li> </ul> | •                                 | •                               | •                                        |

Abbreviations: EPA = eicosapentaenoic acid; TFA = trans fatty acids; DHA = docosahexaenoic acid; DPA = docosapentaenoic acid; MUFA- mono-unsaturated fatty acids; FA = fatty acids; PUFA- polyunsaturated fatty acids; SFA- saturated fatty acids;
